# Supplementary material for: Genotype-Specific Growth and Proteomic Responses of Maize Toward Salt Stress
Source: Front Plant Sci. 2018 May 30;9:661. doi: 10.3389/fpls.2018.00661 (PMC5989331; doi:10.3389/fpls.2018.00661)
Supplement: Supplementary file 5 [file Table_3.XLSX]

## Sheet: Supplementary Table S3
List of Paralogues Genes of Class III Plant Peroxidases Present in Four Maize Genotypes
Protein	GrameneID	Chromosomal Location of Peroxidase Gene	Paralog Genes	Chromosomal Location of Paralogs	Target %id	Query %id	Cytoscape Code
B4FNI0	Zm00001d014467	Chromosome 5: 49,119,308-49,122,774	Zm00001d018619	7:1,162,875-1,177,195:1	27.38 %	39.89 %	P1
			Zm00001d026357	10:144,191,354-144,192,970:1	46.95 %	49.03 %	P2
			Zm00001d038599	6:160,734,732-160,736,672:1	44.71 %	42.11 %	P3
			Zm00001d037410	6:124,806,566-124,807,970:-1	48.82 %	45.71 %	P4
			Zm00001d010064	8:98,038,266-98,039,602:-1	52.60 %	47.65 %	P5
			Zm00001d018620	7:1,225,807-1,226,820:1	40.36 %	37.67 %	P6
			Zm00001d043238	3:192,749,904-192,751,950:1	42.66 %	41.83 %	P7
			Zm00001d038598	6:160,693,573-160,695,070:1	56.35 %	50.42 %	P8
			Zm00001d020797	7:133,228,000-133,229,271:-1	58.80 %	46.26 %	P9
			Zm00001d045846	9:43,395,025-43,397,774:1	39.17 %	23.55 %	P10
			Zm00001d053839	4:242,139,070-242,141,067:1	51.80 %	31.86 %	P11
			Zm00001d018618	7:1,148,023-1,149,778:1	52.21 %	49.03 %	P12
			Zm00001d045845	9:43,387,648-43,389,074:-1	50.45 %	46.54 %	P13
			Zm00001d032405	1:225,600,676-225,602,868:-1	42.25 %	41.55 %	P14
			Zm00001d040399	3:41,314,143-41,316,176:-1	43.06 %	41.27 %	P15
			Zm00001d023899	10:27,167,732-27,171,648:1	44.07 %	43.21 %	P16
			Zm00001d008266	8:3,527,558-3,529,941:-1	42.27 %	40.17 %	P17
			Zm00001d041827	3:139,485,794-139,487,585:1	39.35 %	36.84 %	P18
			Zm00001d049071	4:14,760,627-14,762,515:1	38.55 %	36.84 %	P19
			Zm00001d035336	6:21,911,375-21,912,966:1	38.71 %	36.57 %	P20
B4FY83	Zm00001d009140	Chromosome 8: 38,889,088-38,892,860	Zm00001d040705	3:59,360,005-59,362,184:1	59.24 %	61.24 %	P21
			Zm00001d040702	3:59,064,582-59,072,226:1	60.49 %	62.36 %	P22
			Zm00001d037547	6:128,952,506-128,954,001:1	49.17 %	49.72 %	P23
			Zm00001d009138	8:38,826,801-38,828,721:1	54.42 %	55.34 %	P24
			Zm00001d037550	6:129,101,873-129,103,497:1	50.14 %	50.28 %	P25
			Zm00001d024750	10:86,031,628-86,032,341:-1	46.41 %	30.90 %	P26
			Zm00001d010924	8:133,674,282-133,675,882:-1	45.54 %	42.98 %	P27
			Zm00001d022290	7:174,596,758-174,598,577:-1	25.54 %	40.17 %	P28
			Zm00001d006933	2:219,651,816-219,653,211:-1	39.13 %	40.45 %	P29
			Zm00001d024740	10:85,787,555-85,788,772:1	37.00 %	33.99 %	P30
			Zm00001d022282	7:174,371,833-174,373,313:1	35.53 %	37.92 %	P31
			Zm00001d024738	10:85,734,218-85,735,478:-1	38.17 %	36.24 %	P32
			Zm00001d024753	10:86,312,505-86,313,524:1	46.61 %	44.38 %	P33
			Zm00001d010925	8:133,733,061-133,734,092:1	42.59 %	38.76 %	P34
			Zm00001d017696	5:204,473,993-204,475,006:-1	47.77 %	45.22 %	P35
			Zm00001d024745	10:85,907,865-85,909,124:-1	45.86 %	43.54 %	P36
			Zm00001d022280	7:174,357,832-174,359,086:1	39.43 %	38.76 %	P37
			Zm00001d024751	10:86,089,300-86,090,579:-1	45.86 %	43.54 %	P38
			Zm00001d029274	1:64,514,340-64,515,829:1	39.10 %	36.80 %	P39
			Zm00001d040578	3:50,995,292-50,996,597:1	42.04 %	39.33 %	P40
			Zm00001d022281	7:174,364,090-174,365,550:-1	35.29 %	38.76 %	P41
			Zm00001d029279	1:64,616,235-64,617,629:1	45.24 %	42.70 %	P42
			Zm00001d022279	7:174,342,434-174,343,644:1	38.46 %	37.92 %	P43
			Zm00001d029280	1:64,685,464-64,686,836:1	45.10 %	42.70 %	P44
			Zm00001d040579	3:51,168,951-51,170,008:-1	27.64 %	25.00 %	P45
			Zm00001d022289	7:174,559,300-174,560,747:-1	39.89 %	40.45 %	P46
			Zm00001d022283	7:174,421,503-174,422,768:1	39.43 %	38.76 %	P47
			Zm00001d006937	2:219,871,994-219,873,518:-1	36.46 %	38.20 %	P48
			Zm00001d024752	10:86,136,391-86,137,413:-1	45.88 %	43.82 %	P49
			Zm00001d006936	2:219,725,578-219,733,085:1	27.15 %	38.20 %	P50
			Zm00001d022284	7:174,454,005-174,455,529:-1	35.04 %	38.48 %	P51
			Zm00001d029747	1:85,172,704-85,174,464:1	45.77 %	41.01 %	P52
			Zm00001d027411	1:4,718,946-4,722,343:-1	45.90 %	42.42 %	P53
			Zm00001d037061	6:111,052,880-111,054,567:1	32.78 %	38.76 %	P54
			Zm00001d035055	6:3,326,114-3,327,085:-1	37.46 %	33.99 %	P55
			Zm00001d025774	10:129,119,828-129,135,482:-1	23.35 %	31.74 %	P56
			Zm00001d016443	5:162,551,303-162,553,340:1	39.58 %	36.80 %	P57
B6T3V1	Zm00001d040364	Chromosome 3: 40,090,612-40,092,906	Zm00001d008299	8:4,564,526-4,566,716:-1	87.98 %	90.09 %	P58
			Zm00001d003707	2:55,659,655-55,661,242:-1	60.99 %	66.67 %	P59
			Zm00001d025402	10:117,254,855-117,256,471:1	61.80 %	66.07 %	P60
			Zm00001d009373	8:60,723,769-60,726,263:1	70.09 %	71.77 %	P61
			Zm00001d008300	8:4,575,727-4,577,201:1	53.82 %	57.06 %	P62
			Zm00001d020808	7:133,517,158-133,521,665:-1	23.79 %	42.94 %	P63
			Zm00001d024119	10:46,971,393-46,973,252:1	43.90 %	48.65 %	P64
			Zm00001d047984	9:147,154,886-147,157,449:1	34.70 %	33.03 %	P65
			Zm00001d030199	1:112,977,908-112,980,275:1	47.77 %	48.35 %	P66
			Zm00001d037359	6:122,793,612-122,795,290:-1	42.24 %	44.14 %	P67
			Zm00001d014341	5:41,784,280-41,786,309:-1	45.03 %	46.25 %	P68
			Zm00001d014123	5:33,202,990-33,204,555:1	48.64 %	48.35 %	P69
			Zm00001d028349	1:31,555,841-31,557,666:-1	47.90 %	48.05 %	P70
			Zm00001d032854	1:240,356,665-240,358,382:1	50.30 %	50.75 %	P71
			Zm00001d010218	8:104,571,958-104,573,658:-1	43.94 %	43.54 %	P72
			Zm00001d028347	1:31,513,628-31,515,158:1	47.16 %	47.45 %	P73
			Zm00001d028348	1:31,548,999-31,551,114:-1	49.40 %	49.85 %	P74
B6THU9	Zm00001d014467	Chromosome 5: 49,119,308-49,122,774	Zm00001d018619	7:1,162,875-1,177,195:1	27.38 %	39.89 %	P1
			Zm00001d026357	10:144,191,354-144,192,970:1	46.95 %	49.03 %	P2
			Zm00001d038599	6:160,734,732-160,736,672:1	44.71 %	42.11 %	P3
			Zm00001d037410	6:124,806,566-124,807,970:-1	48.82 %	45.71 %	P4
			Zm00001d010064	8:98,038,266-98,039,602:-1	52.60 %	47.65 %	P5
			Zm00001d018620	7:1,225,807-1,226,820:1	40.36 %	37.67 %	P6
			Zm00001d043238	3:192,749,904-192,751,950:1	42.66 %	41.83 %	P7
			Zm00001d038598	6:160,693,573-160,695,070:1	56.35 %	50.42 %	P8
			Zm00001d020797	7:133,228,000-133,229,271:-1	58.80 %	46.26 %	P9
			Zm00001d045846	9:43,395,025-43,397,774:1	39.17 %	23.55 %	P10
			Zm00001d053839	4:242,139,070-242,141,067:1	51.80 %	31.86 %	P11
			Zm00001d018618	7:1,148,023-1,149,778:1	52.21 %	49.03 %	P12
			Zm00001d045845	9:43,387,648-43,389,074:-1	50.45 %	46.54 %	P13
			Zm00001d032405	1:225,600,676-225,602,868:-1	42.25 %	41.55 %	P14
			Zm00001d040399	3:41,314,143-41,316,176:-1	43.06 %	41.27 %	P15
			Zm00001d023899	10:27,167,732-27,171,648:1	44.07 %	43.21 %	P16
			Zm00001d008266	8:3,527,558-3,529,941:-1	42.27 %	40.17 %	P17
			Zm00001d041827	3:139,485,794-139,487,585:1	39.35 %	36.84 %	P18
			Zm00001d049071	4:14,760,627-14,762,515:1	38.55 %	36.84 %	P19
			Zm00001d035336	6:21,911,375-21,912,966:1	38.71 %	36.57 %	P20
C0HHA6	Zm00001d008173	Chromosome 8: 177,310-178,785	Zm00001d040581	3:51,339,912-51,341,352:1	93.97 %	93.97 %	P75
			Zm00001d024734	10:85,620,431-85,625,034:1	64.12 %	65.23 %	P76
			Zm00001d010926	8:133,734,451-133,743,726:-1	63.64 %	34.20 %	P77
			Zm00001d050572	4:101,438,256-101,439,631:1	40.94 %	40.23 %	P78
			Zm00001d024735	10:85,695,716-85,696,928:1	34.71 %	36.21 %	P79
A5H452	Zm00001d022458	Chromosome 7: 178,123,617-178,125,871	Zm00001d022457	7:178,107,698-178,109,315:-1	53.08 %	67.04 %	P80
			Zm00001d007161	2:223,601,902-223,603,313:1	52.87 %	61.48 %	P81
			Zm00001d007160	2:223,566,224-223,567,878:1	52.50 %	62.22 %	P82
			Zm00001d022456	7:178,096,703-178,098,298:-1	63.39 %	59.63 %	P83
			Zm00001d029604	1:78,770,081-78,773,320:1	51.17 %	64.81 %	P84
			Zm00001d021965	7:167,218,706-167,220,496:1	52.69 %	65.19 %	P85
			Zm00001d002042	2:4,919,846-4,921,440:1	44.44 %	56.30 %	P86
			Zm00001d036835	6:103,312,927-103,315,228:-1	50.16 %	59.63 %	P87
			Zm00001d022453	7:178,050,752-178,052,455:1	41.98 %	50.37 %	P88
			Zm00001d047514	9:133,158,891-133,160,539:-1	45.02 %	55.19 %	P89
			Zm00001d052335	4:187,347,862-187,349,757:1	52.19 %	61.85 %	P90
			Zm00001d052336	4:187,360,339-187,362,982:1	45.56 %	60.74 %	P91
			Zm00001d046035	9:57,472,672-57,474,026:1	38.89 %	46.67 %	P92
			Zm00001d046187	9:70,336,697-70,338,169:-1	47.50 %	56.30 %	P93
			Zm00001d046186	9:70,325,553-70,327,150:-1	47.99 %	57.41 %	P94
			Zm00001d008898	8:24,390,470-24,391,888:1	42.40 %	53.70 %	P95
			Zm00001d053554	4:233,852,901-233,854,306:1	53.70 %	64.44 %	P96
			Zm00001d016179	5:148,742,473-148,743,688:-1	41.01 %	48.15 %	P97
			Zm00001d016177	5:148,637,887-148,639,074:-1	49.38 %	58.89 %	P98
			Zm00001d016185	5:148,955,813-148,957,970:-1	47.35 %	56.30 %	P99
			Zm00001d046184	9:70,231,085-70,232,642:1	50.16 %	58.15 %	P100
			Zm00001d016182	5:148,940,279-148,942,010:-1	45.96 %	54.81 %	P101
A5H8G4	Zm00001d040702	Chromosome 3: 59,064,582-59,072,226	Zm00001d040705	3:59,360,005-59,362,184:1	64.95 %	65.12 %	P21
			Zm00001d009140	8:38,889,088-38,892,860:-1	62.36 %	60.49 %	P102
			Zm00001d009138	8:38,826,801-38,828,721:1	54.42 %	53.68 %	P24
			Zm00001d024750	10:86,031,628-86,032,341:-1	50.21 %	32.43 %	P26
			Zm00001d037547	6:128,952,506-128,954,001:1	49.72 %	48.77 %	P23
			Zm00001d037550	6:129,101,873-129,103,497:1	49.30 %	47.96 %	P25
			Zm00001d024753	10:86,312,505-86,313,524:1	49.26 %	45.50 %	P33
			Zm00001d029747	1:85,172,704-85,174,464:1	49.22 %	42.78 %	P52
			Zm00001d024745	10:85,907,865-85,909,124:-1	49.11 %	45.23 %	P36
			Zm00001d024751	10:86,089,300-86,090,579:-1	49.11 %	45.23 %	P38
			Zm00001d027411	1:4,718,946-4,722,343:-1	48.94 %	43.87 %	P53
			Zm00001d029279	1:64,616,235-64,617,629:1	48.21 %	44.14 %	P42
			Zm00001d029280	1:64,685,464-64,686,836:1	48.07 %	44.14 %	P44
			Zm00001d017696	5:204,473,993-204,475,006:-1	47.77 %	43.87 %	P35
			Zm00001d024752	10:86,136,391-86,137,413:-1	47.35 %	43.87 %	P49
			Zm00001d010925	8:133,733,061-133,734,092:1	46.60 %	41.14 %	P34
			Zm00001d010924	8:133,674,282-133,675,882:-1	46.43 %	42.51 %	P27
			Zm00001d029274	1:64,514,340-64,515,829:1	45.37 %	41.42 %	P39
			Zm00001d040578	3:50,995,292-50,996,597:1	45.35 %	41.14 %	P40
			Zm00001d016443	5:162,551,303-162,553,340:1	43.81 %	39.51 %	P57
			Zm00001d022283	7:174,421,503-174,422,768:1	42.00 %	40.05 %	P47
			Zm00001d022279	7:174,342,434-174,343,644:1	41.60 %	39.78 %	P43
			Zm00001d022280	7:174,357,832-174,359,086:1	41.43 %	39.51 %	P37
			Zm00001d006933	2:219,651,816-219,653,211:-1	40.76 %	40.87 %	P29
			Zm00001d022289	7:174,559,300-174,560,747:-1	40.72 %	40.05 %	P46
			Zm00001d024740	10:85,787,555-85,788,772:1	40.06 %	35.69 %	P30
			Zm00001d024738	10:85,734,218-85,735,478:-1	39.05 %	35.97 %	P32
			Zm00001d006937	2:219,871,994-219,873,518:-1	38.87 %	39.51 %	P48
			Zm00001d022282	7:174,371,833-174,373,313:1	38.42 %	39.78 %	P31
			Zm00001d022281	7:174,364,090-174,365,550:-1	37.85 %	40.33 %	P41
			Zm00001d022284	7:174,454,005-174,455,529:-1	37.85 %	40.33 %	P51
			Zm00001d035055	6:3,326,114-3,327,085:-1	37.77 %	33.24 %	P55
			Zm00001d037061	6:111,052,880-111,054,567:1	33.73 %	38.69 %	P54
			Zm00001d040579	3:51,168,951-51,170,008:-1	29.50 %	25.89 %	P45
			Zm00001d006936	2:219,725,578-219,733,085:1	28.94 %	39.51 %	P50
			Zm00001d022290	7:174,596,758-174,598,577:-1	26.25 %	40.05 %	P28
			Zm00001d025774	10:129,119,828-129,135,482:-1	24.79 %	32.70 %	P56
B4FCI9	Zm00001d042022	Chromosome 3: 147,649,548-147,650,907	Zm00001d042019	3:147,549,893-147,551,603:-1	56.34 %	55.40 %	P103
			Zm00001d002898	2:26,127,575-26,129,149:-1	47.04 %	46.26 %	P104
			Zm00001d002897	2:26,123,823-26,125,478:-1	44.78 %	45.15 %	P105
			Zm00001d002901	2:26,183,514-26,184,548:-1	42.73 %	40.72 %	P106
			Zm00001d002899	2:26,144,895-26,145,908:-1	40.95 %	38.23 %	P107
			Zm00001d026683	10:149,852,402-149,853,787:-1	36.87 %	38.50 %	P108
			Zm00001d002902	2:26,197,358-26,201,770:-1	35.56 %	26.59 %	P109
B6T7B1	Zm00001d030199	Chromosome 1: 112,977,908-112,980,275	Zm00001d014341	5:41,784,280-41,786,309:-1	69.30 %	70.33 %	P68
			Zm00001d028348	1:31,548,999-31,551,114:-1	63.10 %	62.91 %	P74
			Zm00001d028347	1:31,513,628-31,515,158:1	57.31 %	56.97 %	P73
			Zm00001d010218	8:104,571,958-104,573,658:-1	50.00 %	48.96 %	P72
			Zm00001d009373	8:60,723,769-60,726,263:1	48.39 %	48.96 %	P61
			Zm00001d040364	3:40,090,612-40,092,906:-1	48.35 %	47.77 %	P110
			Zm00001d008299	8:4,564,526-4,566,716:-1	47.80 %	48.37 %	P58
			Zm00001d028349	1:31,555,841-31,557,666:-1	47.60 %	47.18 %	P70
			Zm00001d014123	5:33,202,990-33,204,555:1	45.92 %	45.10 %	P69
			Zm00001d032854	1:240,356,665-240,358,382:1	44.64 %	44.51 %	P71
			Zm00001d025402	10:117,254,855-117,256,471:1	43.82 %	46.29 %	P60
			Zm00001d003707	2:55,659,655-55,661,242:-1	42.03 %	45.40 %	P59
			Zm00001d008300	8:4,575,727-4,577,201:1	40.79 %	42.73 %	P62
			Zm00001d024119	10:46,971,393-46,973,252:1	39.84 %	43.62 %	P64
			Zm00001d047984	9:147,154,886-147,157,449:1	39.12 %	36.80 %	P65
			Zm00001d037359	6:122,793,612-122,795,290:-1	37.93 %	39.17 %	P67
			Zm00001d020808	7:133,517,158-133,521,665:-1	23.79 %	42.43 %	P63
K7U159	Zm00001d024745	Chromosome 10: 85,907,865-85,909,124	Zm00001d024751	10:86,089,300-86,090,579:-1	100.00 %	100.00 %	P38
			Zm00001d024750	10:86,031,628-86,032,341:-1	100.00 %	70.12 %	P26
			Zm00001d024752	10:86,136,391-86,137,413:-1	92.65 %	93.20 %	P49
			Zm00001d024753	10:86,312,505-86,313,524:1	87.02 %	87.28 %	P33
			Zm00001d010925	8:133,733,061-133,734,092:1	79.32 %	76.04 %	P34
			Zm00001d017696	5:204,473,993-204,475,006:-1	68.55 %	68.34 %	P35
			Zm00001d029280	1:64,685,464-64,686,836:1	49.85 %	49.70 %	P44
			Zm00001d029279	1:64,616,235-64,617,629:1	49.70 %	49.41 %	P42
			Zm00001d029747	1:85,172,704-85,174,464:1	48.59 %	45.86 %	P52
			Zm00001d040578	3:50,995,292-50,996,597:1	48.35 %	47.63 %	P40
			Zm00001d037550	6:129,101,873-129,103,497:1	47.34 %	50.00 %	P25
			Zm00001d009138	8:38,826,801-38,828,721:1	46.96 %	50.30 %	P24
			Zm00001d010924	8:133,674,282-133,675,882:-1	46.73 %	46.45 %	P27
			Zm00001d029274	1:64,514,340-64,515,829:1	45.97 %	45.56 %	P39
			Zm00001d022280	7:174,357,832-174,359,086:1	45.71 %	47.34 %	P37
			Zm00001d022283	7:174,421,503-174,422,768:1	45.71 %	47.34 %	P47
			Zm00001d027411	1:4,718,946-4,722,343:-1	45.59 %	44.38 %	P53
			Zm00001d040702	3:59,064,582-59,072,226:1	45.23 %	49.11 %	P22
			Zm00001d022279	7:174,342,434-174,343,644:1	44.73 %	46.45 %	P43
			Zm00001d037547	6:128,952,506-128,954,001:1	44.72 %	47.63 %	P23
			Zm00001d040705	3:59,360,005-59,362,184:1	44.29 %	48.22 %	P21
			Zm00001d006933	2:219,651,816-219,653,211:-1	43.75 %	47.63 %	P29
			Zm00001d009140	8:38,889,088-38,892,860:-1	43.54 %	45.86 %	P102
			Zm00001d024740	10:85,787,555-85,788,772:1	43.12 %	41.72 %	P30
			Zm00001d006937	2:219,871,994-219,873,518:-1	42.09 %	46.45 %	P48
			Zm00001d024738	10:85,734,218-85,735,478:-1	41.42 %	41.42 %	P32
			Zm00001d016443	5:162,551,303-162,553,340:1	41.39 %	40.53 %	P57
			Zm00001d022282	7:174,371,833-174,373,313:1	41.32 %	46.45 %	P31
			Zm00001d022281	7:174,364,090-174,365,550:-1	40.66 %	47.04 %	P41
			Zm00001d022284	7:174,454,005-174,455,529:-1	40.41 %	46.75 %	P51
			Zm00001d022289	7:174,559,300-174,560,747:-1	39.34 %	42.01 %	P46
			Zm00001d035055	6:3,326,114-3,327,085:-1	39.01 %	37.28 %	P55
			Zm00001d037061	6:111,052,880-111,054,567:1	33.49 %	41.72 %	P54
			Zm00001d040579	3:51,168,951-51,170,008:-1	33.23 %	31.66 %	P45
			Zm00001d006936	2:219,725,578-219,733,085:1	31.54 %	46.75 %	P50
			Zm00001d022290	7:174,596,758-174,598,577:-1	28.39 %	47.04 %	P28
			Zm00001d025774	10:129,119,828-129,135,482:-1	25.41 %	36.39 %	P56
B1A9R4	Zm00001d002897	Chromosome 2: 26,123,823-26,125,478	Zm00001d002898	2:26,127,575-26,129,149:-1	82.54 %	80.49 %	P104
			Zm00001d002901	2:26,183,514-26,184,548:-1	52.62 %	49.73 %	P106
			Zm00001d002899	2:26,144,895-26,145,908:-1	45.99 %	42.58 %	P107
			Zm00001d002902	2:26,197,358-26,201,770:-1	45.56 %	33.79 %	P109
			Zm00001d042022	3:147,649,548-147,650,907:-1	45.15 %	44.78 %	P111
			Zm00001d042019	3:147,549,893-147,551,603:-1	41.13 %	40.11 %	P103
			Zm00001d026683	10:149,852,402-149,853,787:-1	37.67 %	39.01 %	P108
B4FRD6	Zm00001d004459	Chromosome 2: 113,249,960-113,251,885	Zm00001d032406	1:225,680,256-225,681,338:-1	34.97 %	29.92 %	P114
			Zm00001d047066	9:117,131,800-117,135,172:1	34.66 %	29.66 %	P115
			Zm00001d030002	1:98,510,056-98,512,418:1	32.13 %	30.45 %	P116
			Zm00001d047064	9:117,063,757-117,064,900:-1	34.44 %	29.92 %	P117
			Zm00001d048413	9:155,825,046-155,826,964:1	28.96 %	33.60 %	P118
			Zm00001d027710	1:11,715,889-11,717,774:1	29.35 %	34.12 %	P119
C0P3T3	Zm00001d025402	Chromosome 10: 117,254,855-117,256,471	Zm00001d003707	2:55,659,655-55,661,242:-1	88.19 %	90.17 %	P59
			Zm00001d009373	8:60,723,769-60,726,263:1	68.33 %	65.45 %	P61
			Zm00001d040364	3:40,090,612-40,092,906:-1	66.07 %	61.80 %	P110
			Zm00001d008299	8:4,564,526-4,566,716:-1	63.93 %	61.24 %	P58
			Zm00001d008300	8:4,575,727-4,577,201:1	51.56 %	51.12 %	P62
			Zm00001d028349	1:31,555,841-31,557,666:-1	49.10 %	46.07 %	P70
			Zm00001d028348	1:31,548,999-31,551,114:-1	48.81 %	46.07 %	P74
			Zm00001d028347	1:31,513,628-31,515,158:1	47.76 %	44.94 %	P73
			Zm00001d032854	1:240,356,665-240,358,382:1	47.62 %	44.94 %	P71
			Zm00001d014123	5:33,202,990-33,204,555:1	46.53 %	43.26 %	P69
			Zm00001d030199	1:112,977,908-112,980,275:1	46.29 %	43.82 %	P66
			Zm00001d014341	5:41,784,280-41,786,309:-1	45.32 %	43.54 %	P68
			Zm00001d024119	10:46,971,393-46,973,252:1	43.36 %	44.94 %	P64
			Zm00001d010218	8:104,571,958-104,573,658:-1	43.33 %	40.17 %	P72
			Zm00001d037359	6:122,793,612-122,795,290:-1	41.38 %	40.45 %	P67
			Zm00001d047984	9:147,154,886-147,157,449:1	34.38 %	30.62 %	P65
			Zm00001d020808	7:133,517,158-133,521,665:-1	23.79 %	40.17 %	P63
B4FH68	Zm00001d002898	Chromosome 2: 26,127,575-26,129,149	Zm00001d002897	2:26,123,823-26,125,478:-1	80.49 %	82.54 %	P105
			Zm00001d002901	2:26,183,514-26,184,548:-1	51.74 %	50.14 %	P106
			Zm00001d002899	2:26,144,895-26,145,908:-1	47.48 %	45.07 %	P107
			Zm00001d042022	3:147,649,548-147,650,907:-1	46.26 %	47.04 %	P111
			Zm00001d002902	2:26,197,358-26,201,770:-1	45.93 %	34.93 %	P109
			Zm00001d042019	3:147,549,893-147,551,603:-1	41.97 %	41.97 %	P103
			Zm00001d026683	10:149,852,402-149,853,787:-1	38.73 %	41.13 %	P108
C0PF45	Zm00001d022457	Chromosome 7: 178,107,698-178,109,315	Zm00001d007161	2:223,601,902-223,603,313:1	69.75 %	64.22 %	P81
			Zm00001d007160	2:223,566,224-223,567,878:1	68.44 %	64.22 %	P82
			Zm00001d022456	7:178,096,703-178,098,298:-1	68.11 %	50.73 %	P83
			Zm00001d022458	7:178,123,617-178,125,871:-1	67.04 %	53.08 %	P112
			Zm00001d021965	7:167,218,706-167,220,496:1	63.77 %	62.46 %	P85
			Zm00001d029604	1:78,770,081-78,773,320:1	62.28 %	62.46 %	P84
			Zm00001d016177	5:148,637,887-148,639,074:-1	59.94 %	56.60 %	P98
			Zm00001d046184	9:70,231,085-70,232,642:1	59.11 %	54.25 %	P100
			Zm00001d002042	2:4,919,846-4,921,440:1	57.89 %	58.06 %	P86
			Zm00001d053554	4:233,852,901-233,854,306:1	57.72 %	54.84 %	P96
			Zm00001d036835	6:103,312,927-103,315,228:-1	56.39 %	53.08 %	P87
			Zm00001d052335	4:187,347,862-187,349,757:1	56.25 %	52.79 %	P90
			Zm00001d046186	9:70,325,553-70,327,150:-1	55.73 %	52.79 %	P94
			Zm00001d016185	5:148,955,813-148,957,970:-1	55.45 %	52.20 %	P99
			Zm00001d046187	9:70,336,697-70,338,169:-1	53.12 %	49.85 %	P93
			Zm00001d047514	9:133,158,891-133,160,539:-1	52.87 %	51.32 %	P89
			Zm00001d052336	4:187,360,339-187,362,982:1	52.22 %	55.13 %	P91
			Zm00001d016182	5:148,940,279-148,942,010:-1	52.17 %	49.27 %	P101
			Zm00001d008898	8:24,390,470-24,391,888:1	51.46 %	51.61 %	P95
			Zm00001d016179	5:148,742,473-148,743,688:-1	49.53 %	46.04 %	P97
			Zm00001d022453	7:178,050,752-178,052,455:1	47.22 %	44.87 %	P88
			Zm00001d046035	9:57,472,672-57,474,026:1	43.21 %	41.06 %	P92
A0A096S7C9	Zm00001d007160	Chromosome 2: 223,566,224-223,567,878	Zm00001d007161	2:223,601,902-223,603,313:1	82.48 %	80.94 %	P81
			Zm00001d022456	7:178,096,703-178,098,298:-1	79.92 %	63.44 %	P83
			Zm00001d022457	7:178,107,698-178,109,315:-1	64.81 %	69.06 %	P80
			Zm00001d022458	7:178,123,617-178,125,871:-1	62.59 %	52.81 %	P112
			Zm00001d021965	7:167,218,706-167,220,496:1	59.88 %	62.50 %	P85
			Zm00001d029604	1:78,770,081-78,773,320:1	56.73 %	60.62 %	P84
			Zm00001d002042	2:4,919,846-4,921,440:1	48.25 %	51.56 %	P86
			Zm00001d047514	9:133,158,891-133,160,539:-1	48.94 %	50.62 %	P89
			Zm00001d052336	4:187,360,339-187,362,982:1	49.72 %	55.94 %	P91
			Zm00001d052335	4:187,347,862-187,349,757:1	54.38 %	54.38 %	P90
			Zm00001d036835	6:103,312,927-103,315,228:-1	53.58 %	53.75 %	P87
			Zm00001d022453	7:178,050,752-178,052,455:1	43.52 %	44.06 %	P88
			Zm00001d016179	5:148,742,473-148,743,688:-1	45.74 %	45.31 %	P97
			Zm00001d016177	5:148,637,887-148,639,074:-1	54.97 %	55.31 %	P98
			Zm00001d053554	4:233,852,901-233,854,306:1	54.01 %	54.69 %	P96
			Zm00001d016182	5:148,940,279-148,942,010:-1	51.24 %	51.56 %	P101
			Zm00001d046035	9:57,472,672-57,474,026:1	42.28 %	42.81 %	P92
			Zm00001d046187	9:70,336,697-70,338,169:-1	50.00 %	50.00 %	P93
			Zm00001d046184	9:70,231,085-70,232,642:1	56.87 %	55.62 %	P100
			Zm00001d008898	8:24,390,470-24,391,888:1	47.08 %	50.31 %	P95
			Zm00001d046186	9:70,325,553-70,327,150:-1	51.39 %	51.88 %	P94
			Zm00001d016185	5:148,955,813-148,957,970:-1	52.02 %	52.19 %	P99
B4F8D7	Zm00001d024734	Chromosome 10: 85,620,431-85,625,034	Zm00001d010926	8:133,734,451-133,743,726:-1	87.17 %	46.05 %	P77
			Zm00001d024735	10:85,695,716-85,696,928:1	38.57 %	39.55 %	P79
			Zm00001d050572	4:101,438,256-101,439,631:1	42.69 %	41.24 %	P78
			Zm00001d040581	3:51,339,912-51,341,352:1	67.53 %	66.38 %	P75
			Zm00001d008173	8:177,310-178,785:-1	66.09 %	64.97 %	P113
B4FG39	Zm00001d002901	Chromosome 2: 26,183,514-26,184,548	Zm00001d026683	10:149,852,402-149,853,787:-1	43.24 %	47.38 %	P108
			Zm00001d002902	2:26,197,358-26,201,770:-1	50.37 %	39.53 %	P109
			Zm00001d002899	2:26,144,895-26,145,908:-1	50.15 %	49.13 %	P107
			Zm00001d002897	2:26,123,823-26,125,478:-1	49.73 %	52.62 %	P105
			Zm00001d002898	2:26,127,575-26,129,149:-1	51.83 %	53.49 %	P104
			Zm00001d042019	3:147,549,893-147,551,603:-1	38.59 %	39.83 %	P103
			Zm00001d042022	3:147,649,548-147,650,907:-1	41.55 %	43.60 %	P111
B4G1S4	Zm00001d002897	Chromosome 2: 26,123,823-26,125,478	Zm00001d002898	2:26,127,575-26,129,149:-1	84.79 %	82.69 %	P104
			Zm00001d026683	10:149,852,402-149,853,787:-1	39.26 %	40.66 %	P108
			Zm00001d002899	2:26,144,895-26,145,908:-1	47.48 %	43.96 %	P107
			Zm00001d002901	2:26,183,514-26,184,548:-1	52.62 %	49.73 %	P106
			Zm00001d002902	2:26,197,358-26,201,770:-1	47.04 %	34.89 %	P109
			Zm00001d042019	3:147,549,893-147,551,603:-1	43.10 %	42.03 %	P103
			Zm00001d042022	3:147,649,548-147,650,907:-1	46.26 %	45.88 %	P111
B6SIU4	Zm00001d002899	Chromosome 2: 26,144,895-26,145,908	Zm00001d026683	10:149,852,402-149,853,787:-1	42.97 %	48.07 %	P108
			Zm00001d002901	2:26,183,514-26,184,548:-1	49.13 %	50.15 %	P106
			Zm00001d002902	2:26,197,358-26,201,770:-1	47.78 %	38.28 %	P109
			Zm00001d002897	2:26,123,823-26,125,478:-1	43.96 %	47.48 %	P105
			Zm00001d002898	2:26,127,575-26,129,149:-1	44.79 %	47.18 %	P104
			Zm00001d042019	3:147,549,893-147,551,603:-1	35.49 %	37.39 %	P103
			Zm00001d042022	3:147,649,548-147,650,907:-1	39.06 %	41.84 %	P111
B6SMR2	Zm00001d002004	Chromosome 2: 4,177,227-4,180,187	Zm00001d014608	5:55,120,384-55,123,266:1	66.77 %	66.57 %	P120
			Zm00001d014606	5:55,056,929-55,058,534:1	46.37 %	44.28 %	P121
			Zm00001d014602	5:54,872,612-54,874,306:-1	39.22 %	36.14 %	P122
			Zm00001d014601	5:54,849,718-54,851,421:-1	47.83 %	46.39 %	P123
			Zm00001d014603	5:54,917,913-54,919,530:1	48.12 %	46.39 %	P124
			Zm00001d013212	5:6,625,547-6,627,076:-1	42.38 %	41.87 %	P125
			Zm00001d034128	1:284,686,236-284,687,788:1	42.04 %	42.17 %	P126
			Zm00001d007952	2:243,982,042-243,983,760:1	45.24 %	45.78 %	P127
			Zm00001d005279	2:167,218,110-167,219,679:-1	42.53 %	33.43 %	P128
			Zm00001d034129	1:284,692,621-284,695,285:1	44.38 %	47.59 %	P129
			Zm00001d031635	1:196,944,233-196,947,143:-1	45.10 %	45.78 %	P130
			Zm00001d006097	2:198,119,518-198,121,782:-1	43.28 %	43.67 %	P131
			Zm00001d003381	2:42,343,911-42,345,140:1	32.76 %	40.36 %	P132
			Zm00001d043938	3:214,301,131-214,304,383:-1	36.29 %	40.66 %	P133
			Zm00001d017996	5:211,642,539-211,643,627:1	37.57 %	40.96 %	P134
			Zm00001d052285	4:185,966,317-185,967,390:-1	38.38 %	41.27 %	P135
B6TMI9	Zm00001d002042	Chromosome 2: 4,919,846-4,921,440	Zm00001d022458	7:178,123,617-178,125,871:-1	56.30 %	44.44 %	P112
			Zm00001d021965	7:167,218,706-167,220,496:1	57.78 %	56.43 %	P85
			Zm00001d029604	1:78,770,081-78,773,320:1	55.56 %	55.56 %	P84
			Zm00001d007160	2:223,566,224-223,567,878:1	51.56 %	48.25 %	P82
			Zm00001d022457	7:178,107,698-178,109,315:-1	58.65 %	58.48 %	P80
			Zm00001d007161	2:223,601,902-223,603,313:1	54.46 %	50.00 %	P81
			Zm00001d022456	7:178,096,703-178,098,298:-1	54.33 %	40.35 %	P83
			Zm00001d047514	9:133,158,891-133,160,539:-1	55.29 %	53.51 %	P89
			Zm00001d052336	4:187,360,339-187,362,982:1	49.17 %	51.75 %	P91
			Zm00001d052335	4:187,347,862-187,349,757:1	53.75 %	50.29 %	P90
			Zm00001d036835	6:103,312,927-103,315,228:-1	54.83 %	51.46 %	P87
			Zm00001d022453	7:178,050,752-178,052,455:1	52.78 %	50.00 %	P88
			Zm00001d016179	5:148,742,473-148,743,688:-1	46.06 %	42.69 %	P97
			Zm00001d016177	5:148,637,887-148,639,074:-1	50.62 %	47.66 %	P98
			Zm00001d053554	4:233,852,901-233,854,306:1	52.47 %	49.71 %	P96
			Zm00001d016182	5:148,940,279-148,942,010:-1	48.45 %	45.61 %	P101
			Zm00001d046035	9:57,472,672-57,474,026:1	43.83 %	41.52 %	P92
			Zm00001d046187	9:70,336,697-70,338,169:-1	50.62 %	47.37 %	P93
			Zm00001d046184	9:70,231,085-70,232,642:1	53.35 %	48.83 %	P100
			Zm00001d008898	8:24,390,470-24,391,888:1	48.25 %	48.25 %	P95
			Zm00001d046186	9:70,325,553-70,327,150:-1	52.94 %	50.00 %	P94
			Zm00001d016185	5:148,955,813-148,957,970:-1	53.89 %	50.58 %	P99
B6U6W0	Zm00001d002042	Chromosome 2: 4,919,846-4,921,440	Zm00001d022458	7:178,123,617-178,125,871:-1	56.30 %	44.44 %	P112
			Zm00001d021965	7:167,218,706-167,220,496:1	57.78 %	56.43 %	P85
			Zm00001d029604	1:78,770,081-78,773,320:1	55.56 %	55.56 %	P84
			Zm00001d007160	2:223,566,224-223,567,878:1	51.56 %	48.25 %	P82
			Zm00001d022457	7:178,107,698-178,109,315:-1	58.65 %	58.48 %	P80
			Zm00001d007161	2:223,601,902-223,603,313:1	54.46 %	50.00 %	P81
			Zm00001d022456	7:178,096,703-178,098,298:-1	54.33 %	40.35 %	P83
			Zm00001d047514	9:133,158,891-133,160,539:-1	55.29 %	53.51 %	P89
			Zm00001d052336	4:187,360,339-187,362,982:1	49.17 %	51.75 %	P91
			Zm00001d052335	4:187,347,862-187,349,757:1	53.75 %	50.29 %	P90
			Zm00001d036835	6:103,312,927-103,315,228:-1	54.83 %	51.46 %	P87
			Zm00001d022453	7:178,050,752-178,052,455:1	52.78 %	50.00 %	P88
			Zm00001d016179	5:148,742,473-148,743,688:-1	46.06 %	42.69 %	P97
			Zm00001d016177	5:148,637,887-148,639,074:-1	50.62 %	47.66 %	P98
			Zm00001d053554	4:233,852,901-233,854,306:1	52.47 %	49.71 %	P96
			Zm00001d016182	5:148,940,279-148,942,010:-1	48.45 %	45.61 %	P101
			Zm00001d046035	9:57,472,672-57,474,026:1	43.83 %	41.52 %	P92
			Zm00001d046187	9:70,336,697-70,338,169:-1	50.62 %	47.37 %	P93
			Zm00001d046184	9:70,231,085-70,232,642:1	53.35 %	48.83 %	P100
			Zm00001d008898	8:24,390,470-24,391,888:1	48.25 %	48.25 %	P95
			Zm00001d046186	9:70,325,553-70,327,150:-1	52.94 %	50.00 %	P94
			Zm00001d016185	5:148,955,813-148,957,970:-1	53.89 %	50.58 %	P99
B7ZXQ8	Zm00001d002899	Chromosome 2: 26,144,895-26,145,908	Zm00001d026683	10:149,852,402-149,853,787:-1	42.97 %	48.07 %	P108
			Zm00001d002901	2:26,183,514-26,184,548:-1	49.13 %	50.15 %	P106
			Zm00001d002902	2:26,197,358-26,201,770:-1	47.78 %	38.28 %	P109
			Zm00001d002897	2:26,123,823-26,125,478:-1	43.96 %	47.48 %	P105
			Zm00001d002898	2:26,127,575-26,129,149:-1	44.79 %	47.18 %	P104
			Zm00001d042019	3:147,549,893-147,551,603:-1	35.49 %	37.39 %	P103
			Zm00001d042022	3:147,649,548-147,650,907:-1	39.06 %	41.84 %	P111
C0P4S1	Zm00001d008173	Chromosome 8: 177,310-178,785	Zm00001d040581	3:51,339,912-51,341,352:1	93.97 %	93.97 %	P75
			Zm00001d024735	10:85,695,716-85,696,928:1	35.26 %	36.78 %	P79
			Zm00001d010926	8:133,734,451-133,743,726:-1	63.64 %	34.20 %	P77
			Zm00001d024734	10:85,620,431-85,625,034:1	64.97 %	66.09 %	P76
			Zm00001d050572	4:101,438,256-101,439,631:1	40.64 %	39.94 %	P78
C0PPB6	Zm00001d007161	Chromosome 2: 223,601,902-223,603,313	Zm00001d007160	2:223,566,224-223,567,878:1	80.94 %	82.48 %	P82
			Zm00001d022456	7:178,096,703-178,098,298:-1	79.53 %	64.33 %	P83
			Zm00001d022457	7:178,107,698-178,109,315:-1	64.81 %	70.38 %	P80
			Zm00001d022458	7:178,123,617-178,125,871:-1	62.22 %	53.50 %	P112
			Zm00001d021965	7:167,218,706-167,220,496:1	59.88 %	63.69 %	P85
			Zm00001d029604	1:78,770,081-78,773,320:1	57.02 %	62.10 %	P84
			Zm00001d002042	2:4,919,846-4,921,440:1	50.00 %	54.46 %	P86
			Zm00001d047514	9:133,158,891-133,160,539:-1	50.15 %	52.87 %	P89
			Zm00001d052336	4:187,360,339-187,362,982:1	49.44 %	56.69 %	P91
			Zm00001d052335	4:187,347,862-187,349,757:1	54.06 %	55.10 %	P90
			Zm00001d036835	6:103,312,927-103,315,228:-1	53.89 %	55.10 %	P87
			Zm00001d022453	7:178,050,752-178,052,455:1	46.30 %	47.77 %	P88
			Zm00001d016179	5:148,742,473-148,743,688:-1	46.06 %	46.50 %	P97
			Zm00001d016177	5:148,637,887-148,639,074:-1	54.97 %	56.37 %	P98
			Zm00001d053554	4:233,852,901-233,854,306:1	55.56 %	57.32 %	P96
			Zm00001d016182	5:148,940,279-148,942,010:-1	51.55 %	52.87 %	P101
			Zm00001d046035	9:57,472,672-57,474,026:1	42.59 %	43.95 %	P92
			Zm00001d046187	9:70,336,697-70,338,169:-1	51.25 %	52.23 %	P93
			Zm00001d046184	9:70,231,085-70,232,642:1	55.59 %	55.41 %	P100
			Zm00001d008898	8:24,390,470-24,391,888:1	47.66 %	51.91 %	P95
			Zm00001d046186	9:70,325,553-70,327,150:-1	52.32 %	53.82 %	P94
			Zm00001d016185	5:148,955,813-148,957,970:-1	54.21 %	55.41 %	P99
D7NLB3	Zm00001d038598	Chromosome 6: 160,693,573-160,695,070	Zm00001d020797	7:133,228,000-133,229,271:-1	97.54 %	85.76 %	P9
			Zm00001d010064	8:98,038,266-98,039,602:-1	89.91 %	91.02 %	P5
			Zm00001d018618	7:1,148,023-1,149,778:1	64.60 %	67.80 %	P12
			Zm00001d037410	6:124,806,566-124,807,970:-1	59.47 %	62.23 %	P4
			Zm00001d045846	9:43,395,025-43,397,774:1	50.69 %	34.06 %	P10
			Zm00001d045845	9:43,387,648-43,389,074:-1	60.66 %	62.54 %	P13
			Zm00001d026357	10:144,191,354-144,192,970:1	49.87 %	58.20 %	P2
			Zm00001d043238	3:192,749,904-192,751,950:1	45.76 %	50.15 %	P7
			Zm00001d038599	6:160,734,732-160,736,672:1	46.76 %	49.23 %	P3
			Zm00001d018620	7:1,225,807-1,226,820:1	45.10 %	47.06 %	P6
			Zm00001d018619	7:1,162,875-1,177,195:1	29.47 %	47.99 %	P1
			Zm00001d053839	4:242,139,070-242,141,067:1	43.24 %	29.72 %	P11
			Zm00001d014467	5:49,119,308-49,122,774:1	51.52 %	57.59 %	P136
			Zm00001d032405	1:225,600,676-225,602,868:-1	48.17 %	52.94 %	P14
			Zm00001d008266	8:3,527,558-3,529,941:-1	38.48 %	40.87 %	P17
			Zm00001d040399	3:41,314,143-41,316,176:-1	39.31 %	42.11 %	P15
			Zm00001d023899	10:27,167,732-27,171,648:1	42.37 %	46.44 %	P16
			Zm00001d041827	3:139,485,794-139,487,585:1	39.05 %	40.87 %	P18
			Zm00001d049071	4:14,760,627-14,762,515:1	38.55 %	41.18 %	P19
			Zm00001d035336	6:21,911,375-21,912,966:1	37.54 %	39.63 %	P20
K7UG68	Zm00001d024749	Chromosome 10: 85,988,783-85,989,775
K7VCN5	Zm00001d009373	Chromosome 8: 60,723,769-60,726,263	Zm00001d025402	10:117,254,855-117,256,471:1	64.89 %	67.74 %	P60
			Zm00001d003707	2:55,659,655-55,661,242:-1	62.91 %	67.16 %	P59
			Zm00001d008299	8:4,564,526-4,566,716:-1	68.62 %	68.62 %	P58
			Zm00001d040364	3:40,090,612-40,092,906:-1	71.17 %	69.50 %	P110
			Zm00001d008300	8:4,575,727-4,577,201:1	52.69 %	54.55 %	P62
			Zm00001d030199	1:112,977,908-112,980,275:1	48.37 %	47.80 %	P66
			Zm00001d028347	1:31,513,628-31,515,158:1	49.55 %	48.68 %	P73
			Zm00001d037359	6:122,793,612-122,795,290:-1	40.52 %	41.35 %	P67
			Zm00001d014341	5:41,784,280-41,786,309:-1	44.74 %	44.87 %	P68
			Zm00001d014123	5:33,202,990-33,204,555:1	45.62 %	44.28 %	P69
			Zm00001d028348	1:31,548,999-31,551,114:-1	49.70 %	48.97 %	P74
			Zm00001d010218	8:104,571,958-104,573,658:-1	44.55 %	43.11 %	P72
			Zm00001d047984	9:147,154,886-147,157,449:1	33.44 %	31.09 %	P65
			Zm00001d028349	1:31,555,841-31,557,666:-1	46.41 %	45.45 %	P70
			Zm00001d032854	1:240,356,665-240,358,382:1	46.13 %	45.45 %	P71
			Zm00001d020808	7:133,517,158-133,521,665:-1	23.13 %	40.76 %	P63
			Zm00001d024119	10:46,971,393-46,973,252:1	42.55 %	46.04 %	P64
Q6RFK3	Zm00001d037547	Chromosome 6: 128,952,506-128,954,001	Zm00001d037550	6:129,101,873-129,103,497:1	80.11 %	79.44 %	P25
			Zm00001d009138	8:38,826,801-38,828,721:1	61.33 %	61.67 %	P24
			Zm00001d040702	3:59,064,582-59,072,226:1	48.77 %	49.72 %	P22
			Zm00001d009140	8:38,889,088-38,892,860:-1	49.72 %	49.17 %	P102
			Zm00001d040705	3:59,360,005-59,362,184:1	48.91 %	50.00 %	P21
			Zm00001d029747	1:85,172,704-85,174,464:1	51.10 %	45.28 %	P52
			Zm00001d027411	1:4,718,946-4,722,343:-1	49.24 %	45.00 %	P53
			Zm00001d024752	10:86,136,391-86,137,413:-1	47.94 %	45.28 %	P49
			Zm00001d022290	7:174,596,758-174,598,577:-1	25.36 %	39.44 %	P28
			Zm00001d022280	7:174,357,832-174,359,086:1	39.71 %	38.61 %	P37
			Zm00001d022281	7:174,364,090-174,365,550:-1	36.32 %	39.44 %	P41
			Zm00001d010924	8:133,674,282-133,675,882:-1	43.75 %	40.83 %	P27
			Zm00001d029280	1:64,685,464-64,686,836:1	45.99 %	43.06 %	P44
			Zm00001d017696	5:204,473,993-204,475,006:-1	45.40 %	42.50 %	P35
			Zm00001d024740	10:85,787,555-85,788,772:1	38.53 %	35.00 %	P30
			Zm00001d022279	7:174,342,434-174,343,644:1	40.46 %	39.44 %	P43
			Zm00001d024751	10:86,089,300-86,090,579:-1	48.22 %	45.28 %	P38
			Zm00001d024745	10:85,907,865-85,909,124:-1	48.22 %	45.28 %	P36
			Zm00001d029279	1:64,616,235-64,617,629:1	45.54 %	42.50 %	P42
			Zm00001d040578	3:50,995,292-50,996,597:1	44.74 %	41.39 %	P40
			Zm00001d006936	2:219,725,578-219,733,085:1	27.54 %	38.33 %	P50
			Zm00001d022282	7:174,371,833-174,373,313:1	37.37 %	39.44 %	P31
			Zm00001d022284	7:174,454,005-174,455,529:-1	36.32 %	39.44 %	P51
			Zm00001d006937	2:219,871,994-219,873,518:-1	37.00 %	38.33 %	P48
			Zm00001d010925	8:133,733,061-133,734,092:1	45.37 %	40.83 %	P34
			Zm00001d006933	2:219,651,816-219,653,211:-1	42.12 %	43.06 %	P29
			Zm00001d022283	7:174,421,503-174,422,768:1	40.29 %	39.17 %	P47
			Zm00001d024750	10:86,031,628-86,032,341:-1	50.63 %	33.33 %	P26
			Zm00001d022289	7:174,559,300-174,560,747:-1	36.29 %	36.39 %	P46
			Zm00001d040579	3:51,168,951-51,170,008:-1	29.50 %	26.39 %	P45
			Zm00001d024738	10:85,734,218-85,735,478:-1	38.76 %	36.39 %	P32
			Zm00001d029274	1:64,514,340-64,515,829:1	45.07 %	41.94 %	P39
			Zm00001d024753	10:86,312,505-86,313,524:1	47.49 %	44.72 %	P33
			Zm00001d037061	6:111,052,880-111,054,567:1	32.78 %	38.33 %	P54
			Zm00001d035055	6:3,326,114-3,327,085:-1	43.03 %	38.61 %	P55
			Zm00001d025774	10:129,119,828-129,135,482:-1	25.21 %	33.89 %	P56
			Zm00001d016443	5:162,551,303-162,553,340:1	43.50 %	40.00 %	P57
Q9ZTS7	Zm00001d007160	Chromosome 2: 223,566,224-223,567,878	Zm00001d007161	2:223,601,902-223,603,313:1	82.48 %	80.94 %	P81
			Zm00001d022456	7:178,096,703-178,098,298:-1	79.92 %	63.44 %	P83
			Zm00001d022457	7:178,107,698-178,109,315:-1	64.81 %	69.06 %	P80
			Zm00001d022458	7:178,123,617-178,125,871:-1	62.59 %	52.81 %	P112
			Zm00001d021965	7:167,218,706-167,220,496:1	59.88 %	62.50 %	P85
			Zm00001d029604	1:78,770,081-78,773,320:1	56.73 %	60.62 %	P84
			Zm00001d002042	2:4,919,846-4,921,440:1	48.25 %	51.56 %	P86
			Zm00001d047514	9:133,158,891-133,160,539:-1	48.94 %	50.62 %	P89
			Zm00001d052336	4:187,360,339-187,362,982:1	49.72 %	55.94 %	P91
			Zm00001d052335	4:187,347,862-187,349,757:1	54.38 %	54.38 %	P90
			Zm00001d036835	6:103,312,927-103,315,228:-1	53.58 %	53.75 %	P87
			Zm00001d022453	7:178,050,752-178,052,455:1	43.52 %	44.06 %	P88
			Zm00001d016179	5:148,742,473-148,743,688:-1	45.74 %	45.31 %	P97
			Zm00001d016177	5:148,637,887-148,639,074:-1	54.97 %	55.31 %	P98
			Zm00001d053554	4:233,852,901-233,854,306:1	54.01 %	54.69 %	P96
			Zm00001d016182	5:148,940,279-148,942,010:-1	51.24 %	51.56 %	P101
			Zm00001d046035	9:57,472,672-57,474,026:1	42.28 %	42.81 %	P92
			Zm00001d046187	9:70,336,697-70,338,169:-1	50.00 %	50.00 %	P93
			Zm00001d046184	9:70,231,085-70,232,642:1	56.87 %	55.62 %	P100
			Zm00001d008898	8:24,390,470-24,391,888:1	47.08 %	50.31 %	P95
			Zm00001d046186	9:70,325,553-70,327,150:-1	51.39 %	51.88 %	P94
			Zm00001d016185	5:148,955,813-148,957,970:-1	52.02 %	52.19 %	P99
Q9ZTS8	Zm00001d014123	Chromosome 5: 33,202,990-33,204,555	Zm00001d032854	1:240,356,665-240,358,382:1	80.36 %	81.57 %	P71
			Zm00001d028349	1:31,555,841-31,557,666:-1	65.57 %	66.16 %	P70
			Zm00001d030199	1:112,977,908-112,980,275:1	46.59 %	47.43 %	P66
			Zm00001d028347	1:31,513,628-31,515,158:1	47.76 %	48.34 %	P73
			Zm00001d014341	5:41,784,280-41,786,309:-1	45.91 %	47.43 %	P68
			Zm00001d028348	1:31,548,999-31,551,114:-1	45.54 %	46.22 %	P74
			Zm00001d010218	8:104,571,958-104,573,658:-1	42.12 %	41.99 %	P72
			Zm00001d047984	9:147,154,886-147,157,449:1	36.91 %	35.35 %	P65
			Zm00001d037359	6:122,793,612-122,795,290:-1	38.22 %	40.18 %	P67
			Zm00001d008300	8:4,575,727-4,577,201:1	43.63 %	46.53 %	P62
			Zm00001d008299	8:4,564,526-4,566,716:-1	46.33 %	47.73 %	P58
			Zm00001d009373	8:60,723,769-60,726,263:1	44.28 %	45.62 %	P61
			Zm00001d025402	10:117,254,855-117,256,471:1	42.98 %	46.22 %	P60
			Zm00001d040364	3:40,090,612-40,092,906:-1	47.75 %	48.04 %	P110
			Zm00001d003707	2:55,659,655-55,661,242:-1	41.48 %	45.62 %	P59
			Zm00001d020808	7:133,517,158-133,521,665:-1	23.63 %	42.90 %	P63
			Zm00001d024119	10:46,971,393-46,973,252:1	42.82 %	47.73 %	P64
Q9ZTS9	Zm00001d022457	Chromosome 7: 178,107,698-178,109,315	Zm00001d007160	2:223,566,224-223,567,878:1	69.06 %	64.81 %	P82
			Zm00001d007161	2:223,601,902-223,603,313:1	70.38 %	64.81 %	P81
			Zm00001d022456	7:178,096,703-178,098,298:-1	68.50 %	51.03 %	P83
			Zm00001d022458	7:178,123,617-178,125,871:-1	67.04 %	53.08 %	P112
			Zm00001d021965	7:167,218,706-167,220,496:1	64.07 %	62.76 %	P85
			Zm00001d029604	1:78,770,081-78,773,320:1	62.28 %	62.46 %	P84
			Zm00001d002042	2:4,919,846-4,921,440:1	58.48 %	58.65 %	P86
			Zm00001d047514	9:133,158,891-133,160,539:-1	53.47 %	51.91 %	P89
			Zm00001d052336	4:187,360,339-187,362,982:1	51.94 %	54.84 %	P91
			Zm00001d052335	4:187,347,862-187,349,757:1	55.94 %	52.49 %	P90
			Zm00001d036835	6:103,312,927-103,315,228:-1	55.76 %	52.49 %	P87
			Zm00001d022453	7:178,050,752-178,052,455:1	47.53 %	45.16 %	P88
			Zm00001d016179	5:148,742,473-148,743,688:-1	49.53 %	46.04 %	P97
			Zm00001d016177	5:148,637,887-148,639,074:-1	59.63 %	56.30 %	P98
			Zm00001d053554	4:233,852,901-233,854,306:1	57.41 %	54.55 %	P96
			Zm00001d016182	5:148,940,279-148,942,010:-1	52.17 %	49.27 %	P101
			Zm00001d046035	9:57,472,672-57,474,026:1	43.52 %	41.35 %	P92
			Zm00001d046187	9:70,336,697-70,338,169:-1	52.50 %	49.27 %	P93
			Zm00001d046184	9:70,231,085-70,232,642:1	58.79 %	53.96 %	P100
			Zm00001d008898	8:24,390,470-24,391,888:1	51.46 %	51.61 %	P95
			Zm00001d046186	9:70,325,553-70,327,150:-1	56.04 %	53.08 %	P94
			Zm00001d016185	5:148,955,813-148,957,970:-1	55.45 %	52.20 %	P99
B4FSW5	Zm00001d024752	Chromosome 10: 86,136,391-86,137,413	Zm00001d024751	10:86,089,300-86,090,579:-1	93.20 %	92.65 %	P38
			Zm00001d024745	10:85,907,865-85,909,124:-1	93.20 %	92.65 %	P36
			Zm00001d024753	10:86,312,505-86,313,524:1	85.55 %	85.29 %	P33
			Zm00001d010925	8:133,733,061-133,734,092:1	81.79 %	77.94 %	P34
			Zm00001d017696	5:204,473,993-204,475,006:-1	69.14 %	68.53 %	P35
			Zm00001d024750	10:86,031,628-86,032,341:-1	95.78 %	66.76 %	P26
			Zm00001d009138	8:38,826,801-38,828,721:1	47.51 %	50.59 %	P24
			Zm00001d037550	6:129,101,873-129,103,497:1	47.90 %	50.29 %	P25
			Zm00001d029280	1:64,685,464-64,686,836:1	48.37 %	47.94 %	P44
			Zm00001d037547	6:128,952,506-128,954,001:1	45.28 %	47.94 %	P23
			Zm00001d029279	1:64,616,235-64,617,629:1	47.92 %	47.35 %	P42
			Zm00001d040705	3:59,360,005-59,362,184:1	43.75 %	47.35 %	P21
			Zm00001d040702	3:59,064,582-59,072,226:1	43.60 %	47.06 %	P22
			Zm00001d040578	3:50,995,292-50,996,597:1	47.75 %	46.76 %	P40
			Zm00001d029747	1:85,172,704-85,174,464:1	49.84 %	46.76 %	P52
			Zm00001d006933	2:219,651,816-219,653,211:-1	42.66 %	46.18 %	P29
			Zm00001d022280	7:174,357,832-174,359,086:1	44.57 %	45.88 %	P37
			Zm00001d022283	7:174,421,503-174,422,768:1	44.57 %	45.88 %	P47
			Zm00001d022281	7:174,364,090-174,365,550:-1	39.64 %	45.59 %	P41
			Zm00001d022284	7:174,454,005-174,455,529:-1	39.64 %	45.59 %	P51
			Zm00001d022290	7:174,596,758-174,598,577:-1	27.50 %	45.29 %	P28
			Zm00001d010924	8:133,674,282-133,675,882:-1	45.54 %	45.00 %	P27
			Zm00001d029274	1:64,514,340-64,515,829:1	45.67 %	45.00 %	P39
			Zm00001d009140	8:38,889,088-38,892,860:-1	42.98 %	45.00 %	P102
			Zm00001d006936	2:219,725,578-219,733,085:1	30.34 %	44.71 %	P50
			Zm00001d022279	7:174,342,434-174,343,644:1	43.02 %	44.41 %	P43
			Zm00001d022282	7:174,371,833-174,373,313:1	39.74 %	44.41 %	P31
			Zm00001d006937	2:219,871,994-219,873,518:-1	40.48 %	44.41 %	P48
			Zm00001d027411	1:4,718,946-4,722,343:-1	44.98 %	43.53 %	P53
			Zm00001d024738	10:85,734,218-85,735,478:-1	43.49 %	43.24 %	P32
			Zm00001d037061	6:111,052,880-111,054,567:1	34.68 %	42.94 %	P54
			Zm00001d024740	10:85,787,555-85,788,772:1	44.65 %	42.94 %	P30
			Zm00001d022289	7:174,559,300-174,560,747:-1	38.78 %	41.18 %	P46
			Zm00001d016443	5:162,551,303-162,553,340:1	41.39 %	40.29 %	P57
			Zm00001d025774	10:129,119,828-129,135,482:-1	25.62 %	36.47 %	P56
			Zm00001d035055	6:3,326,114-3,327,085:-1	37.77 %	35.88 %	P55
			Zm00001d040579	3:51,168,951-51,170,008:-1	32.92 %	31.18 %	P45
